# Supplementary material for: A New Phospholipase D from Moritella sp. JT01: Biochemical Characterization, Crystallization and Application in the Synthesis of Phosphatidic Acid
Source: MDPI journal article supplement (doi:10.3390/ijms231911633), 2022-10-01
Supplement: s1 [file s1]

## Supplementary Information

### **A new phospholipase D from *Moritella* sp. JT01: Biochemical characterization, crystallization and application in the synthesis of phosphatidic acid**

Fanghua Wang <sup>1</sup>, Xuejing Mao <sup>1</sup>, Fuli Deng <sup>1</sup>, Ruiguo Cui <sup>1</sup>, Lilang Li <sup>1</sup>, Siyu Liu <sup>1</sup>,  
Bo Yang <sup>2</sup>, Dongming Lan <sup>1,\*</sup>, Yonghua Wang <sup>1,\*</sup>

<sup>1</sup> School of Food Science and Engineering, South China University of Technology,  
Guangzhou 510640, China

<sup>2</sup> School of Bioscience and Bioengineering, South China University of Technology,  
Guangzhou 510006, China

\*Correspondence: dmlan@scut.edu.cn (D.L.); yonghw@scut.edu.cn (Y.W.), Tel.:  
+86-20-8711-3842

---

**Supplementary Table S1** Summary on purification steps of wild type MsPLD.

| Purification steps    | Total activity (U) <sup>a</sup> | Total protein (mg) | Specific activity (U/mg) | Purification (fold) | Yield (%) |
|-----------------------|---------------------------------|--------------------|--------------------------|---------------------|-----------|
| Crude extract         | 4111                            | 1242.9             | 3.31                     | 1.00                | 100.00    |
| Ni <sup>2+</sup> -NTA | 3311                            | 261.8              | 12.65                    | 3.82                | 80.54     |
| Desalting column      | 2682                            | 200.6              | 13.37                    | 4.04                | 65.23     |

<sup>a</sup> The specific activity and protein concentration were determined as described in methods section.

---

**Supplementary Table S2** Effects of different metal ions on the activity of MsPLD.

| Metal ion        | Concentration (mM) | Relative activity (%) |
|------------------|--------------------|-----------------------|
| None             | 0                  | 100±0.26              |
| Mn <sup>2+</sup> | 5                  | 106.26±0.22           |
|                  | 10                 | 109.99±0.85           |
| Ca <sup>2+</sup> | 5                  | 100.09±0.35           |
|                  | 10                 | 104.12±1.93           |
| Mg <sup>2+</sup> | 5                  | 96.01±2.93            |
|                  | 10                 | 96.50±1.05            |
| Ni <sup>2+</sup> | 5                  | 106.18±0.13           |
|                  | 10                 | 99.28±6.16            |
| Zn <sup>2+</sup> | 5                  | 62.37±0.74            |
|                  | 10                 | 66.40±2.85            |
| Fe <sup>2+</sup> | 5                  | 79.54±0.48            |
|                  | 10                 | 7.14±4.64             |
| Fe <sup>3+</sup> | 5                  | 10.91±0.96            |
|                  | 10                 | 3.83±2.83             |
| Cu <sup>2+</sup> | 5                  | 16.95±0.70            |
|                  | 10                 | 8.94±1.10             |

Note: Enzyme activity without metal ions adding was defined as 100%.

---

**Supplementary Table S3** Data collection and refinement statistics of MsPLD.

| <b>MsPLD</b>                   |                                                                                                    |
|--------------------------------|----------------------------------------------------------------------------------------------------|
| Wavelength                     | 0.97919                                                                                            |
| Resolution range               | 23.36-2.3 (2.38- 2.3)                                                                              |
| Space group                    | P2 <sub>1</sub> 2 <sub>1</sub> 2 <sub>1</sub>                                                      |
| Unit cell                      | a =93.90 Å, b =216.50Å, c=277.45Å<br>$\alpha = 90^\circ$ , $\beta =90^\circ$ , $\gamma = 90^\circ$ |
| Unique reflections             | 250032 (24724)                                                                                     |
| Multiplicity                   | 12.3(6.8)                                                                                          |
| Completeness (%)               | 99.69 (99.38)                                                                                      |
| Mean I/sigma(I)                | 0.6                                                                                                |
| Wilson B-factor                | 49.48                                                                                              |
| R-meas                         | 0.178 (2.892)                                                                                      |
| R-pim                          | 0.050 (0.889)                                                                                      |
| CC1/2                          | 0.995 (0.304)                                                                                      |
| Reflections used in refinement | 249785 (24611)                                                                                     |
| Reflections used for R-free    | 1742 (171)                                                                                         |
| R-work                         | 0.1805 (0.2957)                                                                                    |
| R-free                         | 0.2018 (0.3025)                                                                                    |
| Number of non-hydrogen atoms   | 26491                                                                                              |
| macromolecules                 | 25452                                                                                              |
| ligands                        | 55                                                                                                 |
| solvent                        | 984                                                                                                |
| Protein residues               | 3254                                                                                               |
| RMS(bonds)                     | 0.010                                                                                              |
| RMS(angles)                    | 0.94                                                                                               |
| Ramachandran favored (%)       | 93.72                                                                                              |
| Ramachandran allowed (%)       | 5.50                                                                                               |
| Ramachandran outliers (%)      | 0.77                                                                                               |
| Rotamer outliers (%)           | 1.01                                                                                               |
| Clashscore                     | 5.30                                                                                               |
| Average B-factor               | 61.54                                                                                              |
| macromolecules                 | 61.82                                                                                              |
| ligands                        | 57.29                                                                                              |
| solvent                        | 54.48                                                                                              |
| Number of TLS groups           | 25                                                                                                 |

---

---

**Supplementary Table S4** Primers used in this study.

| Primer         | Sequence (5'to3')*                                                      |
|----------------|-------------------------------------------------------------------------|
| N61C-F         | CACTTCCAGCGAATTTTACT <u>TGCAAATCCTTCGACGCGCTG</u>                       |
| N61C-R         | CAGCGCGTCGAAGGATT <u>TGCAGT</u> AAAATTCGCTGGAAGTG                       |
| E75C-F         | GAGCTTCAACCACGTTGACTCT <u>TGCTTCAACATGTCTACCTGTAACG</u>                 |
| E75C-R         | CGTTACAGGTAGACATGTTGAAG <u>CAAGAGTCAACGTGGTTGAAGCTC</u>                 |
| K102C-F        | CACAGCACCGGCGTACACCAAAAAC <u>TGCGATGGT</u> GATGCTAAAAAAC                |
| K102C-R        | GTTTTTTAGCATCACCATCGCAGTTTTTTGGTGTACGCCGGTGCTGTG                        |
| A156C-F        | TTTCTAGCGGTGCTTTCACCT <u>TGCACC</u> ATTAAAAACGCGCTGAG                   |
| A156C-R        | CTCAGCGCGTTTTTAATGGT <u>GCA</u> GGTGAAAGCACCGCTAGAAA                    |
| S163C-F        | CCATTAAAAACGCGCTGT <u>TGCC</u> CAGCTGGCGAAAAAC                          |
| S163C-R        | GTTTTTCGCCAGCTGG <u>CA</u> CAGCGCGTTTTTAATGG                            |
| R284C-F        | GCGGATTATCTGCAGT <u>TGTA</u> ACCCGGTGAACG                               |
| R284C-R        | CGTTCACCGGGTT <u>ACACT</u> GCAGATAATCCGC                                |
| H258A-F        | TGAACGTTGCTTGGAAC <u>GCCG</u> GTAAAATTATCAACGTTGACAACC                  |
| H258A-R        | TTTACC <u>GGC</u> GTTCCAAGCAACGTTTCAGCAGAACATCTTTCTGGCTG<br>TT          |
| MsPLD-1F0I-1-F | CCCATTTCACCTTCGGCACT <u>CCGGGTTGCTGGGGTGACGATGGTGA</u><br>TGCTAAAAAACT  |
| MsPLD-1F0I-1-R | AGTTTTTTAGCATCACCAT <u>TCGTCACCCCAGCAACCCGGAGTGCCGA</u><br>AGGTGAAGTGGG |
| MsPLD-1F0I-2-F | ACTCCGGGTTGCTGGGGTGACGAC <u>CAAATGCGCTGACGATGGT</u> GAT<br>GCTAAAAAACTG |
| MsPLD-1F0I-2-R | CAGTTTTTTAGCATCACCATC <u>GTCAGCGCATTGTCGTCACCCCAGC</u><br>AACCCGGAGT    |
| Del57-113-F    | GGATACCCACTTCACCTTCGGCACTCCGGCTGATAAAATTCTGGAT<br>GCGA                  |
| Del57-113-R    | TCGCATCCAGAATTTTATCAGCCGGAGTGCCGAAGGTGAAGTGGGT<br>ATCC                  |
| Del65-113-F    | TTCCAGCGAATTTTACAACAAATCCCCGGCTGATAAAATTCTGGAT<br>GCGA                  |
| Del65-113-R    | TCGCATCCAGAATTTTATCAGCCGGGGATTGTTGTAAAATTCGCTG<br>GAA                   |

---

\* Underlined sequences were miss-match regions for site directed mutagenesis.

---

A

|            |            |            |            |            |            |
|------------|------------|------------|------------|------------|------------|
| 10         | 20         | 30         | 40         | 50         | 60         |
| MKIQNKHAMI | ILKSAASAFV | LVSASASAST | NELDVNDIYD | HLNEKYSQFN | DVTFSKPSTN |
| 70         | 80         | 90         | 100        | 110        | 120        |
| YLKPGWILDT | HFTFGTSSEF | YNKSFDAISF | NHVDSEFNMS | TCNDDSECGG | VSTCTAPAYT |
| 130        | 140        | 150        | 160        | 170        | 180        |
| KNKDGDAKKL | CTVPADKILD | AIYDNIVSAK | RSVDIVTLQP | MDISHLNLSF | SSGAFTATIK |
| 190        | 200        | 210        | 220        | 230        | 240        |
| NALSQIAKNT | QYSDHHITVR | LLQGSFTPML | GYDAESEEEE | IRQLSLTQTN | YLSEIASVLP |
| 250        | 260        | 270        | 280        | 290        | 300        |
| EVNNLDITVG | SVRSCNKLIS | NCGNNSQKD  | VLLNVAWNHG | KIINVDNQSV | ITGGHNLWGA |
| 310        | 320        | 330        | 340        | 350        | 360        |
| DYLQRNPVND | LSINILGPIA | STATKYGNTL | WNYVCNNTGT | ITNTFVTYAN | GQYTYDCPAH |
| 370        | 380        | 390        | 400        | 410        | 420        |
| ISSTYVAPTD | AKNGLAVKVM | SISKLNNGVL | DKDADQSEVA | RVYAFKNATK | SIKISQQALF |
| 430        | 440        | 450        | 460        | 470        | 480        |
| FKGAFGKVLH | PLKTIDGTVM | EALASAIYKG | VTVDIVTSSL | DGGIYSSGYN | SEFVYNYLLN |
| 490        | 500        | 510        | 520        | 530        | 540        |
| VLHKAPYYLE | RNYAKTFLDK | NLHINFISIN | GRETNMNSHN | KLWIVDDKVF | YVGS       |
| 550        | 560        | 570        |            |            |            |
| SLQQFGVIVD | DKDATAQLEK | QLWTPMWKNS | IHVPINNS   |            |            |

B

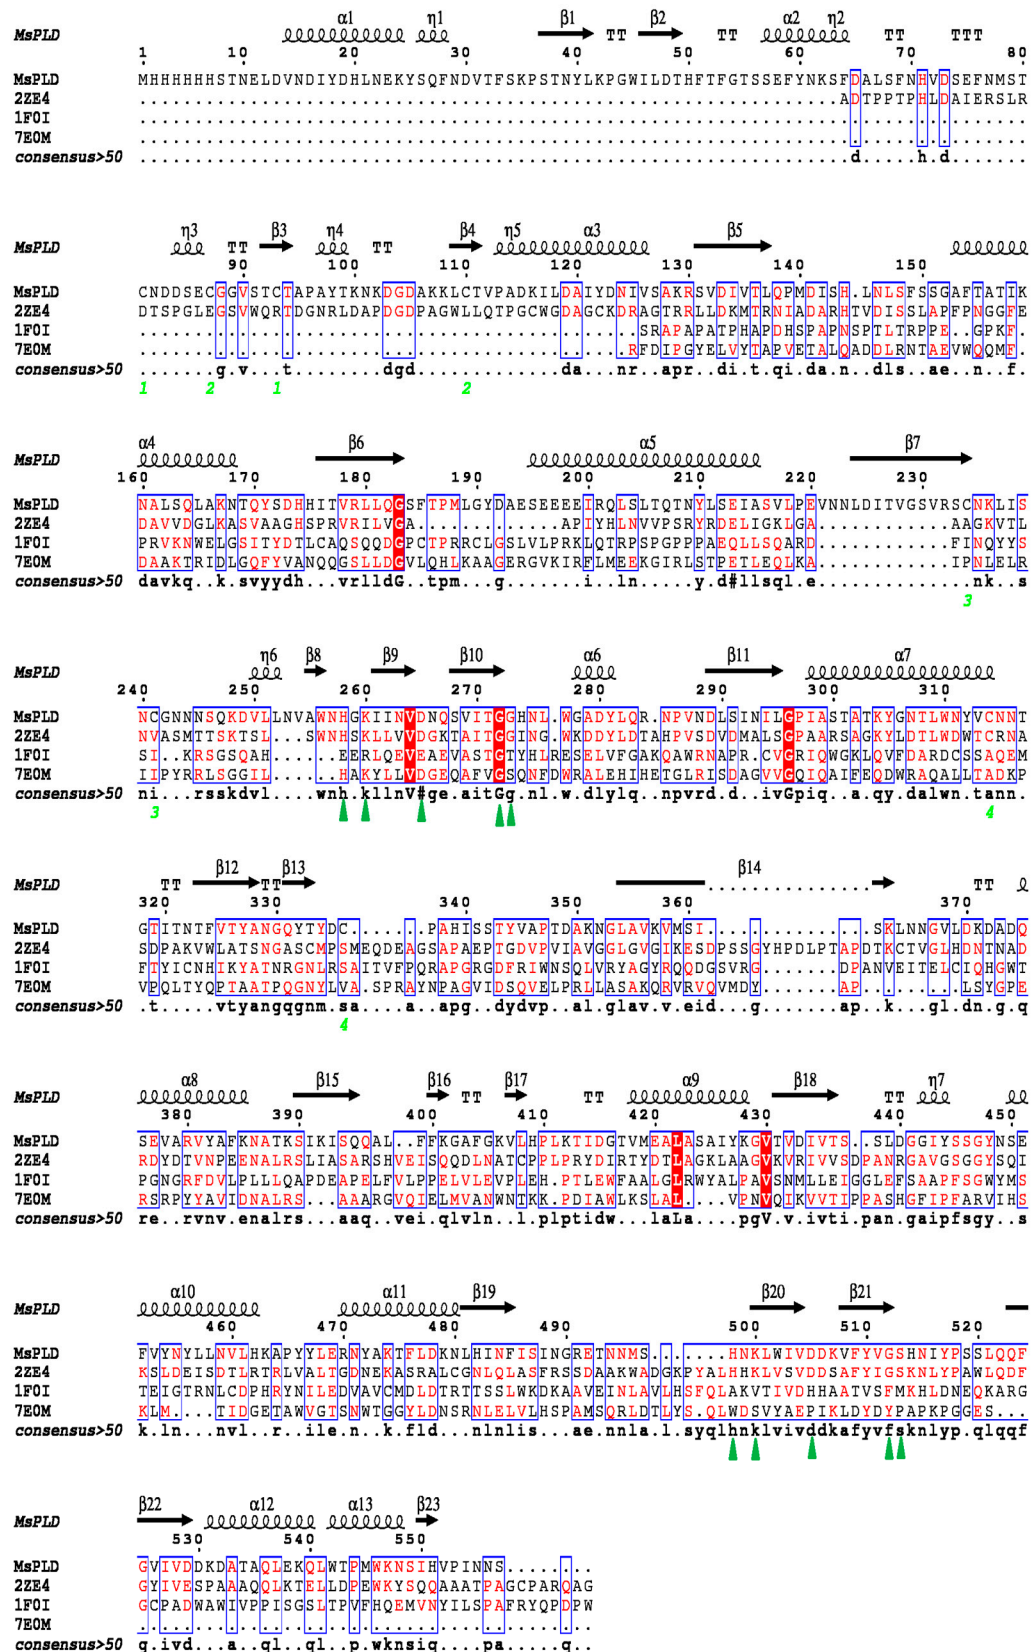

---

**Supplementary Figure S1.** Bioinformatic analysis of MsPLD. (A) Full length amino acid sequence of MsPLD. The deduced signal peptide that predicted with SignalP 5.0 server was labeled in purple. Two conserved HXX(X)<sub>4</sub>D(X)<sub>6</sub>GG/S (HKD) motifs of the PLD superfamily were shown in the red box and key residues were labeled in red. (B) Structural-based amino acid sequence alignment of the mature MsPLD with several other PLDs in the PDB. SpPLD (PDB ID: 7E0M), Streptomyces sp. PMF PLD (PDB ID: 1F0I), SaPLD (PDB ID: 2ZE4). Residues highlighted in blue box were identical among the protein compared. Four pairs of disulfide bonds were numbered.



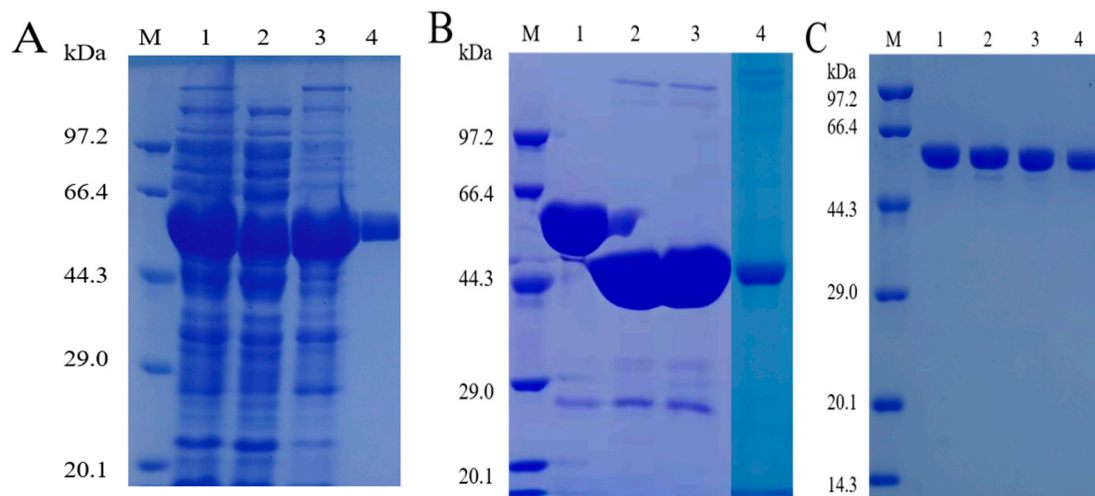

**Supplementary Figure S2.** Sodium dodecyl sulphate-polyacrylamide gel electrophoresis (SDS-PAGE) analysis of the recombinant wild type MsPLD and its corresponding mutants. (A) Wild type MsPLD. Lane M, The protein marker; Lane 1, total cell extract; Lane 2, supernatant of total cell extract; Lane 3, pellet of total cell extract; Lane 4, purified MsPLD by using nickel column chromatography. (B) Purified protein of various mutants. Lane M, The protein marker; Lane 1, MsPLD-H258A; Lane 2, Del57-113; Lane 3, Del65-113; Lane 4, MsPLD-1F0I; (C) Purified protein of wild type and various mutants. Lane M, The protein marker; Lane 1, MsPLD; Lane 2, N61C-R284C; Lane 3, E75C-A156C; Lane 4, K102C-S163C.

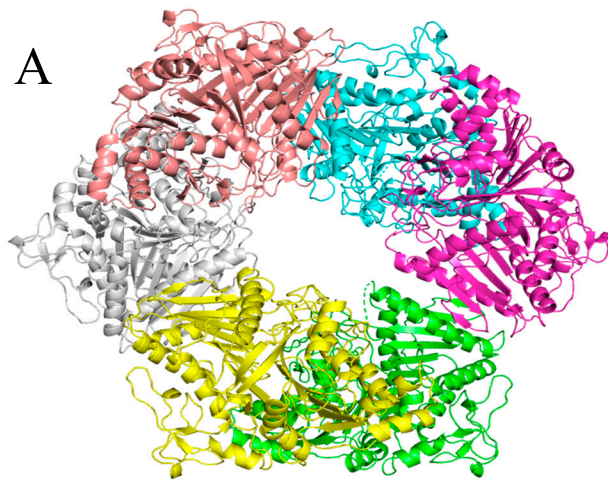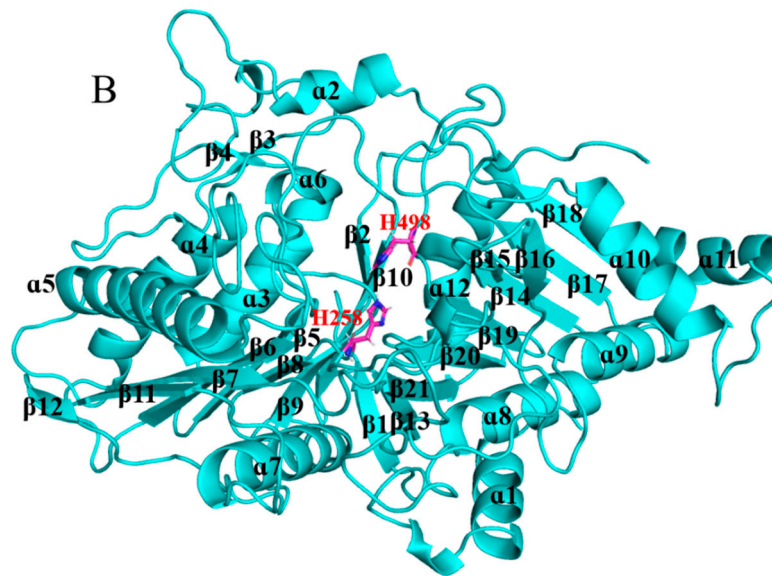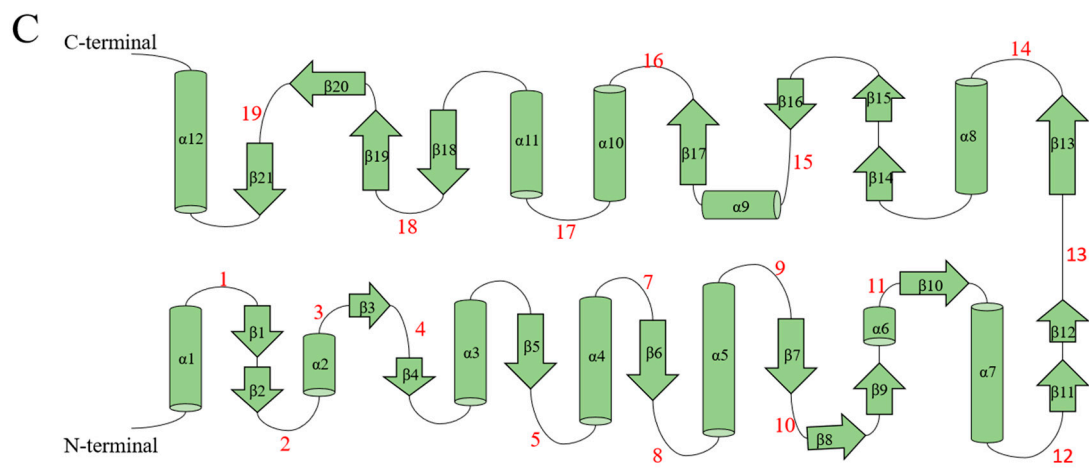

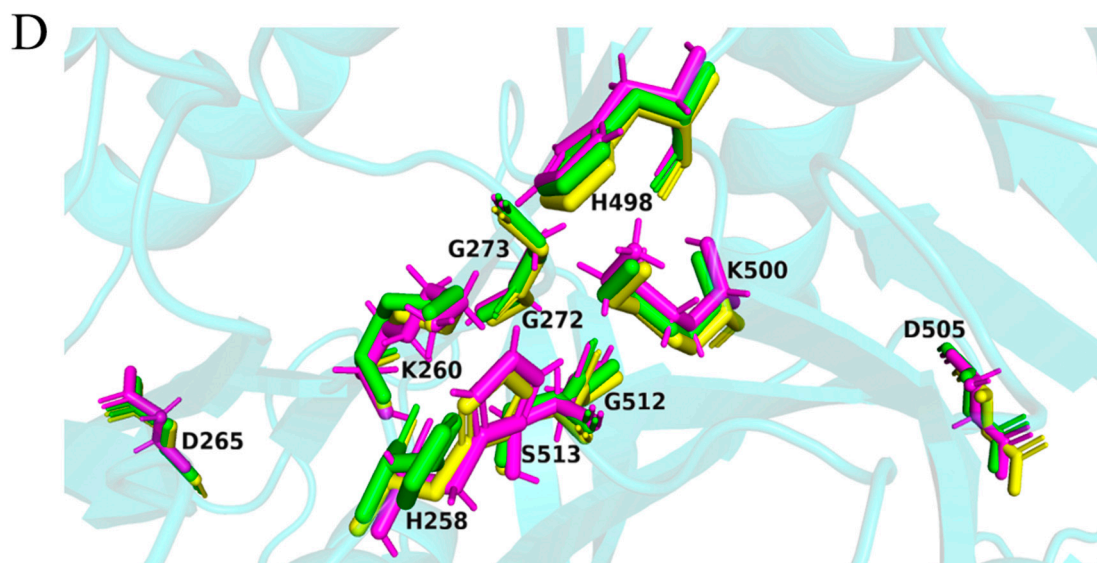

**Supplementary Figure S3.** The three-dimensional (3D) structure of wild type MsPLD.

(A) Six molecules in the asymmetric unit were shown with different colors. (B) Overall structure of MsPLD. MsPLD was composed by 12  $\alpha$  helixs and 21  $\beta$  sheets connected by various loops. Two His258 and H498 located at the active site of the protein were shown in sticks. (C) Overall topology of MsPLD. (D) Two classical HxKxxxxD (HKD) motifs were found in MsPLD and showed high structural consistence with several PLDs within the PDB. MsPLD (magentas, PDB ID: 7WU1), *Streptomyces* sp. PMF PLD (yellow, PDB ID: 1F0I), SaPLD (green, PDB ID: 2ZE4). The 3D molecular visualization was performed with PyMOL software.

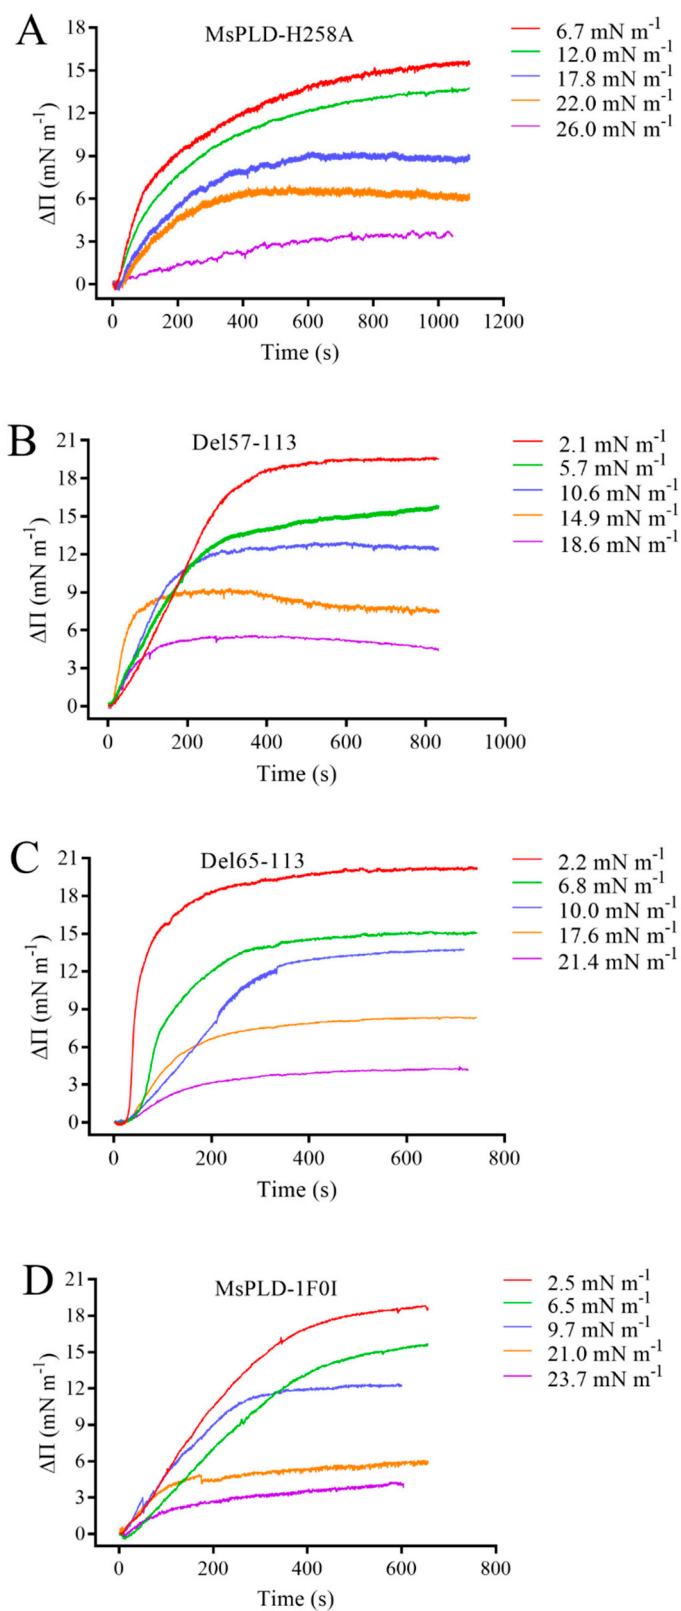

**Supplementary Figure S4.** Effects of various initial surface pressure ( $\Pi_i$ ) on the adsorption of wild type MsPLD or its mutants onto PC monolayer. (A) Effects of various initial surface pressure ( $\Pi_i$ ) on the adsorption of MsPLD-H258A. (B) Effects

---

of various initial surface pressure ( $\Pi_i$ ) on the adsorption of Del57-113. (C) Effects of various initial surface pressure ( $\Pi_i$ ) on the adsorption of Del65-113. (D) Effects of various initial surface pressure ( $\Pi_i$ ) on the adsorption of MsPLD-1F0I. MsPLD and its corresponding mutants (5.0  $\mu$ M final concentration) were injected into the aqueous sub-phase of teflon trough, respectively. Surface pressure increase due to the adsorption of the protein onto phospholipid monolayer that spread at initial surface pressures was continuously monitored.

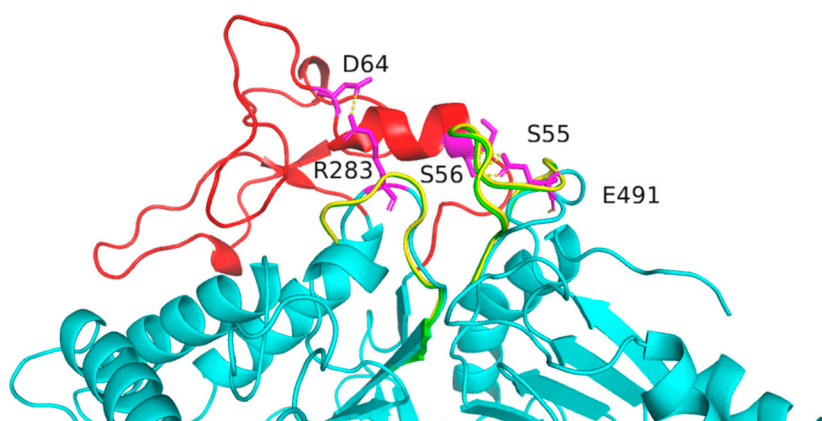

**Supplementary Figure S5.** Partial superimposition and comparison of the three typical loop segments of MsPLD (cyans, PDB ID: 7WU1) with other *Streptomyces* PLDs. *Streptomyces* sp. PMF PLD (yellow, PDB ID: 1F0I), SaPLD (green, PDB ID: 2ZE4). The extra loop segment solely exist on MsPLD was shown in red. The hydrogen bonds formed with related residues between the adjacent two loops were marked by dashed line in orange. Amino acid residues with interactions on the loops were shown in magentas sticks.
